# Supplementary material for: A consensus map for Ug99 stem rust resistance loci in wheat
Source: PubMed Central journal article supplement (PMC4072096; doi:10.1007/s00122-014-2326-7), 2014-06-06
Supplement: 122_2014_2326_MOESM1_ESM.pdf [file 122_2014_2326_MOESM1_ESM.pdf]

| Chromosome 1A |                   | Chromosome 1B |                      | Chromosome 1D |                      |        |
|---------------|-------------------|---------------|----------------------|---------------|----------------------|--------|
| 1             | BS00024039        | 0             | 1 gwm33A             | 0             | 1 BS00058604         | 0      |
| 2             | wPt-730213        | 0             | 2 Gli-A1             | 4.88          | 2 Lr21               | 0      |
| 3             | barc1060          | 0             | 3 wPt-1560           | 5.28          | 3 barc149            | 7.22   |
| 4             | barc62a           | 0             | 4 wPt-8949           | 6.51          | 4 SNPPMOp931433/37   | 13.83  |
| 5             | wPt-8770          | 0             | 5 Rg-1B              | 6.53          | 5 BS00028928         | 16.22  |
| 6             | wPt-1167          | 0             | 6 wPt-3477           | 7.53          | 6 cfd15              | 16.22  |
| 7             | wPt-2527          | 0             | 7 wPt-8930           | 7.86          | 7 gwm33              | 16.22  |
| 8             | wPt-8644          | 0             | 8 SNPPMOp1154177/43  | 8.48          | 8 cdf21              | 21.22  |
| 9             | wPt-0164          | 0             | 9 wPt-2052           | 8.88          | 9 cfd21_2            | 25.63  |
| 10            | wPt-2406          | 0             | 10 wPt-3824          | 11.02         | 10 SNPPMOp123974/65  | 25.63  |
| 11            | wPt-5274          | 0             | 11 BS00010592        | 11.37         | 11 wPt-4647          | 31.84  |
| 12            | wPt-4709          | 0             | 12 BS00076192        | 11.37         | 12 cfd83             | 31.84  |
| 13            | wPt-2976          | 0             | 13 BS00024046        | 12.02         | 13 wPt-9181          | 32.53  |
| 14            | wPt-6005          | 0.74          | 14 BS00050522        | 12.59         | 14 cfd21             | 33.4   |
| 15            | w117500           | 1.13          | 15 wPt-3465          | 12.81         | 15 SNPPMOp1193489/2  | 36.03  |
| 16            | wPt-5577          | 2.89          | 16 gwm608            | 13.38         | 16 bac119            | 37.22  |
| 17            | wPt-0512          | 4.41          | 17 SNPPMOp1013628/57 | 16.08         | 17 wPt-8960          | 37.93  |
| 18            | wmc59             | 8.56          | 18 SyOpL18           | 16.08         | 18 BS00103876        | 37.93  |
| 19            | SNPPMOp104580/35  | 9.33          | 19 SNPPMOp1518985/3  | 16.08         | 19 gwm337            | 37.93  |
| 20            | gwm136            | 11.01         | 20 wPt-1589          | 16.28         | 20 SNPPMOp1481895/60 | 37.93  |
| 21            | SNPPMOp1141478/22 | 11.53         | 21 wPt-4735          | 16.57         | 21 barc119           | 37.93  |
| 22            | gwm550            | 14.59         | 22 wPt-4236          | 17.01         | 22 wPt-7140          | 37.93  |
| 23            | Glu-A3            | 15.27         | 23 SNPPMOp1024350/41 | 17.58         | 23 rPt-4471          | 37.93  |
| 24            | gwm11             | 15.43         | 24 BS00003831        | 17.75         | 24 wPt-5320          | 37.93  |
| 25            | wPt-9752          | 15.63         | 25 BS00022294        | 18.81         | 25 wPt-413           | 37.93  |
| 26            | PAPMOp245483      | 17.53         | 26 wmc49             | 20.38         | 26 wmc611b           | 39.53  |
| 27            | cfd15             | 19.43         | 27 gwm264            | 21.38         | 27 BS00102902        | 43.31  |
| 28            | BS00010267        | 19.65         | 28 BS00022973        | 21.38         | 28 wmc429            | 44.22  |
| 29            | cfd15(2)          | 19.65         | 29 BS00011608        | 21.38         | 29 BS00078897        | 47.29  |
| 30            | wmc336            | 29.43         | 30 wmc51             | 21.38         | 30 BS00034563        | 50.56  |
| 31            | SNPPMOp1717516/29 | 44.23         | 31 wPt-1139          | 21.38         | 31 BS00010435        | 51.37  |
| 32            | wPt-732946        | 46.34         | 32 barc128a          | 21.5          | 32 gwm458            | 51.37  |
| 33            | barc119           | 48.43         | 33 wPt-5801          | 22.68         | 33 wPt3743           | 58.69  |
| 34            | SNPPMOp1097398/77 | 54.43         | 34 SNPPMOp101778/26  | 22.68         | 34 BS00031152        | 61.74  |
| 35            | wPt-9757          | 63.43         | 35 wPt-5562          | 25.48         | 35 wPt-3743          | 61.74  |
| 36            | wmc312            | 63.43         | 36 SNPPMOp1060526/8  | 25.48         | 36 SyOpL1660         | 67.63  |
| 37            | BS00070435        | 63.45         | 37 wPt-2019          | 25.48         | 37 wPt-6059          | 70.16  |
| 38            | SyOpL1046         | 64.13         | 38 wPt-2230          | 26.96         | 38 gwm232            | 100.22 |
| 39            | BS00003863        | 77.09         | 39 wPt-8627          | 26.96         | 39 wPt-10060         | 113.73 |
| 40            | BS00070580        | 78.27         | 40 barc152b          | 26.96         | 40 BS00023957        | 119.85 |
| 41            | wPt-0128          | 84.61         | 41 BS00022135        | 28.89         | 41 BS00099705        | 134.86 |
| 42            | wmc716            | 84.61         | 42 wPt-8240          | 29.57         | 42 wPt-6560          | 135.47 |
| 43            | wPt-5316          | 84.61         | 43 SNPPMOp871728/89  | 31.88         |                      |        |
| 44            | wPt-4658          | 84.61         | 44 SNPPMOp967089/30  | 35.48         |                      |        |
| 45            | wPt-7872          | 84.61         | 45 wPt-5678          | 36.85         |                      |        |
| 46            | wPt-2311          | 84.61         | 46 wPt-6833          | 36.85         |                      |        |
| 47            | wPt-9266          | 84.61         | 47 wPt-6117          | 36.85         |                      |        |
| 48            | wPt-0527          | 84.61         | 48 wmc694            | 38.38         |                      |        |
| 49            | wmc24             | 84.61         | 49 BS00021995        | 41.55         |                      |        |
| 50            | wPt-3698          | 84.61         | 50 barc119           | 46.03         |                      |        |
| 51            | wPt-8105          | 84.61         | 51 wPt-1684          | 48.13         |                      |        |
| 52            | wmc611a           | 84.61         | 52 wPt-0260          | 50.24         |                      |        |
| 53            | wPt-6654          | 84.61         | 53 barc240b          | 50.47         |                      |        |
| 54            | wPt-7030          | 84.61         | 54 BS00090553        | 50.47         |                      |        |
| 55            | wPt-8347          | 84.61         | 55 wPt-3451          | 63.12         |                      |        |
| 56            | wPt-9592          | 85.09         | 56 barc302           | 64.47         |                      |        |
| 57            | Glu-A1            | 90.26         | 57 gwm124            | 65.38         |                      |        |
| 58            | wmc93b            | 90.93         | 58 barc181           | 65.5          |                      |        |
| 59            | SNPPMOp1691201/39 | 91.33         | 59 gwm121            | 65.5          |                      |        |
| 60            | cfa2129           | 92.28         | 60 wPt-0459          | 67.08         |                      |        |
| 61            | wmc93             | 93.52         | 61 wmc419            | 72.69         |                      |        |
| 62            | wmc611c           | 104.13        | 62 Glu-B1            | 72.69         |                      |        |
| 63            | barc17            | 109.43        | 63 cfd48             | 74.82         |                      |        |
| 64            | wPt-734040        | 113.05        | 64 wmc134            | 78.79         |                      |        |
| 65            | wPt-2251          | 120.26        | 65 BS00094555        | 84.32         |                      |        |
| 66            | wPt-7820          | 120.26        | 66 SNPPMOp900880/59  | 84.68         |                      |        |
| 67            | wPt-2436          | 120.26        | 67 gpw3214           | 86.79         |                      |        |
| 68            | wPt-0827          | 134.19        | 68 barc81            | 90.59         |                      |        |
| 69            | wPt-6869          | 148.18        | 69 gpw4410           | 90.59         |                      |        |
| 70            | wPt-3439          | 148.18        | 70 wmc44             | 93.38         |                      |        |
| 71            | wPt-8984          | 161.47        | 71 ncw1              | 93.38         |                      |        |
|               |                   |               | 72 SyOpL524          | 93.38         |                      |        |
|               |                   |               | 73 wPt-9612          | 93.38         |                      |        |
|               |                   |               | 74 wPt-9032          | 93.38         |                      |        |
|               |                   |               | 75 wPt-1403          | 93.38         |                      |        |
|               |                   |               | 76 wmc673            | 93.38         |                      |        |
|               |                   |               | 77 barc256           | 93.38         |                      |        |
|               |                   |               | 78 wPt-4129          | 93.38         |                      |        |
|               |                   |               | 79 wPt-3475          | 93.38         |                      |        |
|               |                   |               | 80 wPt-0944          | 93.38         |                      |        |
|               |                   |               | 81 wPt-2526          | 93.38         |                      |        |
|               |                   |               | 82 wPt-4532          | 93.38         |                      |        |
|               |                   |               | 83 wPt-1770          | 100.51        |                      |        |
|               |                   |               | 84 wPt-1313          | 100.51        |                      |        |
|               |                   |               | 85 wmc367            | 104.38        |                      |        |
|               |                   |               | 86 wPt-4497          | 104.38        |                      |        |
|               |                   |               | 87 wPt-4721          | 104.38        |                      |        |
|               |                   |               | 88 wPt-6142          | 104.38        |                      |        |
|               |                   |               | 89 gpw1077           | 104.38        |                      |        |
|               |                   |               | 90 wPt-4651          | 109.49        |                      |        |
|               |                   |               | 91 BS00009709        | 141.36        |                      |        |
|               |                   |               | 92 wmc728            | 155.12        |                      |        |
|               |                   |               | 93 barc80            | 162.55        |                      |        |
|               |                   |               | 94 BS00001128        | 177.63        |                      |        |

## Chromosome 2A

|    |                  |        |
|----|------------------|--------|
| 1  | barc124          | 0      |
| 2  | wPt-733012       | 0      |
| 3  | wPt-1657         | 0      |
| 4  | gwm356           | 0      |
| 5  | wPt-5887         | 0      |
| 6  | wPt-6687         | 2.36   |
| 7  | BS00022777       | 4.36   |
| 8  | wPt-7739         | 4.96   |
| 9  | barc1147a        | 5.74   |
| 10 | gwm382           | 10.33  |
| 11 | wmc453           | 13.95  |
| 12 | gpw4474.2        | 14.24  |
| 13 | wmc522           | 16.54  |
| 14 | wPt-5647         | 22.86  |
| 15 | wmc407           | 22.86  |
| 16 | gwm339           | 24.61  |
| 17 | gwm275           | 24.61  |
| 18 | gwm95            | 25.58  |
| 19 | gwm372           | 26.86  |
| 20 | barc220          | 27.83  |
| 21 | cfa2263          | 28.81  |
| 22 | barc1150         | 29.86  |
| 23 | wPt-9951         | 30.21  |
| 24 | wPt-6361         | 31.96  |
| 25 | BS00086365       | 33.32  |
| 26 | wPt-4094         | 33.32  |
| 27 | wPt-3114         | 34.56  |
| 28 | wPt-740658       | 38.88  |
| 29 | SyOpL2634        | 39.26  |
| 30 | wPt-2544         | 43.7   |
| 31 | barc311          | 48.81  |
| 32 | SyOpL797         | 51.26  |
| 33 | SNPPMOp167763/46 | 61.86  |
| 34 | gwm558           | 61.86  |
| 35 | wmc177           | 61.86  |
| 36 | wPt-4861         | 72.36  |
| 37 | wPt-5865         | 72.36  |
| 38 | SyOpL1412        | 73.46  |
| 39 | wPt-7056         | 74.73  |
| 40 | wPt-4201         | 86.27  |
| 41 | BS00097263       | 86.27  |
| 42 | wPt-5251         | 86.27  |
| 43 | wPt-7024         | 86.27  |
| 44 | wPt-7011         | 86.27  |
| 45 | gwm120           | 86.77  |
| 46 | BS00022002       | 90.86  |
| 47 | gwm294           | 92.86  |
| 48 | gwm501           | 94.28  |
| 49 | BS00009989       | 96.27  |
| 50 | BS00004405       | 121.68 |
| 51 | BS00100117       | 144.04 |

## Chromosome 2B

|     |                   |        |
|-----|-------------------|--------|
| 1   | BS00090594        | 0      |
| 2   | wPt-5960          | 0      |
| 3   | gwm257            | 0      |
| 4   | wPt-6627          | 1.61   |
| 5   | wPt-6805          | 1.61   |
| 6   | BS00099469        | 4.59   |
| 7   | BS00095004        | 6.82   |
| 8   | BS00010734        | 9.73   |
| 9   | wPt-0100          | 18.1   |
| 10  | wPt-4916          | 19.92  |
| 11  | wPt-6575          | 19.92  |
| 12  | wPt-0643          | 19.92  |
| 13  | wPt-3459          | 19.92  |
| 14  | wPt-5934          | 19.92  |
| 15  | wPt-5195          | 19.92  |
| 16  | wmc764            | 21.26  |
| 17  | wmc382            | 21.57  |
| 18  | wPt-3388          | 21.9   |
| 19  | wPt-9230          | 21.9   |
| 20  | wPt-744022        | 21.9   |
| 21  | wPt-5374          | 23.6   |
| 22  | SyOpL2770_NBS     | 25.8   |
| 23  | SyOpL98           | 28.2   |
| 24  | wPt-6199          | 28.81  |
| 25  | BS00110268        | 28.91  |
| 26  | wmc243c           | 28.91  |
| 27  | wPt-5556          | 29.12  |
| 28  | wPt-7757          | 29.12  |
| 29  | wPt-5672          | 29.12  |
| 30  | wPt-4125          | 29.12  |
| 31  | barc280a          | 29.24  |
| 32  | wPt-8235          | 29.58  |
| 33  | wPt-4453          | 29.58  |
| 34  | wPt-2106          | 30.35  |
| 35  | SyOpL1740         | 30.7   |
| 36  | wPt-5707          | 38.4   |
| 37  | SNPPMOp1059844/18 | 41.6   |
| 38  | SyOpL1100         | 43.7   |
| 39  | SyOpL390          | 44.6   |
| 40  | wPt-9402          | 46     |
| 41  | SNPPMOp150859/8   | 46     |
| 42  | wmc154            | 46     |
| 43  | wPt-3561          | 53.8   |
| 44  | barc280b          | 53.8   |
| 45  | cfd238            | 53.8   |
| 46  | wmc25             | 53.8   |
| 47  | wPt-8398          | 53.8   |
| 48  | wPt-8326          | 53.8   |
| 49  | wPt-8004          | 53.8   |
| 50  | wPt-8404          | 53.8   |
| 51  | barc200           | 53.8   |
| 52  | wPt-0462          | 53.8   |
| 53  | wPt-9423          | 54.17  |
| 54  | wPt-8072          | 54.17  |
| 55  | BS00064156        | 54.37  |
| 56  | wPt-4301          | 54.57  |
| 57  | BS00066626        | 54.92  |
| 58  | wPt-743630        | 55.78  |
| 59  | wmc257            | 56     |
| 60  | SyOpL2669         | 58     |
| 61  | BS00010688        | 59.17  |
| 62  | wPt-2600          | 61     |
| 63  | wPt-8583          | 65.02  |
| 64  | SyOpL2392         | 66.2   |
| 65  | BS00026412        | 66.33  |
| 66  | BS00073842        | 70.6   |
| 67  | wPt-7750          | 71.09  |
| 68  | SyOpL161          | 72.8   |
| 69  | SyOpL1333         | 74.3   |
| 70  | SNPPMOp102229/37  | 74.3   |
| 71  | wmc770            | 75.16  |
| 72  | wPt-5878          | 77     |
| 73  | SyOpL2163         | 77     |
| 74  | SyOpL1007         | 77     |
| 75  | wmc474            | 77     |
| 76  | barc18            | 77     |
| 77  | wPt-0335          | 77.5   |
| 78  | wmc344            | 78     |
| 79  | wPt0335           | 78     |
| 80  | BS00004433        | 78.64  |
| 81  | wPt-8460          | 79.55  |
| 82  | wPt-0408          | 80.03  |
| 83  | wPt-6477          | 80.35  |
| 84  | barc7             | 81.86  |
| 85  | barc13            | 83     |
| 86  | BS00022091        | 83.4   |
| 87  | wmc175A           | 83.96  |
| 88  | BS00074789        | 86.77  |
| 89  | gwm120            | 86.77  |
| 90  | gwm148            | 89.02  |
| 91  | gwm338            | 90     |
| 92  | BS00009461        | 91.96  |
| 93  | gwm501            | 94.28  |
| 94  | wmc592            | 94.75  |
| 95  | BS00009989        | 96.27  |
| 96  | gwm388            | 96.62  |
| 97  | wPt-3132          | 97.1   |
| 98  | wPt-7200          | 97.1   |
| 99  | gpw5162           | 97.1   |
| 100 | barc1042          | 97.1   |
| 101 | gwm120b           | 97.1   |
| 102 | BS00110209        | 100.77 |
| 103 | wPt-1964          | 100.8  |
| 104 | tPt-4125          | 101.95 |
| 105 | BS00003585        | 102.43 |
| 106 | wmc175            | 104    |
| 107 | wPt-0694          | 104.04 |
| 108 | BS00022064        | 104.1  |
| 109 | SNPPMOp1529541/32 | 104.1  |
| 110 | wPt-0697          | 105.82 |
| 111 | wmc332            | 108.16 |
| 112 | wPt-3383          | 108.16 |
| 113 | wPt-799851        | 108.46 |
| 114 | wPt-5128          | 111.88 |
| 115 | wPt-7004          | 115.44 |
| 116 | wPt-7161          | 115.44 |
| 117 | wPt-2108          | 117.19 |
| 118 | wPt-2397          | 121.7  |
| 119 | wPt-4892          | 130.61 |
| 120 | barc1026          | 130.61 |
| 121 | BS00009460        | 131.2  |
| 122 | wPt-2274          | 136.3  |
| 123 | wmc602            | 140    |
| 124 | BS00100117        | 144.04 |
| 125 | wmc361            | 148.16 |
| 126 | wmc317            | 150.32 |
| 127 | wPt-3436          | 161.06 |
| 128 | barc14b           | 178.19 |

## Chromosome 2D

|    |                  |        |
|----|------------------|--------|
| 1  | cfd56            | 0      |
| 2  | SyOpL2571        | 0      |
| 3  | SNPPMOp149247/49 | 0      |
| 4  | SNPPMOp29337/83  | 0      |
| 5  | wPt-10835        | 0      |
| 6  | wPt-2960         | 0      |
| 7  | cfd51            | 2      |
| 8  | barc90           | 3      |
| 9  | BS00072058       | 3.85   |
| 10 | gwm455           | 13.31  |
| 11 | BS00010492       | 13.56  |
| 12 | gwm296           | 17     |
| 13 | SNPPMOp113570/43 | 17.7   |
| 14 | Ppd1             | 19.92  |
| 15 | BS00090678       | 21.13  |
| 16 | cfd44            | 21.13  |
| 17 | gwm261           | 21.35  |
| 18 | wmc503           | 21.35  |
| 19 | gpw294           | 21.68  |
| 20 | gpw4080          | 25.76  |
| 21 | wmc112           | 27.51  |
| 22 | gwm484           | 53.32  |
| 23 | BS00016116       | 56.79  |
| 24 | wPt-4242         | 65.29  |
| 25 | gwm157           | 66     |
| 26 | gwm539           | 68.9   |
| 27 | BS00011752       | 87.01  |
| 28 | wPt-1499         | 114.78 |

## Chromosome 3A

|    |            |        |
|----|------------|--------|
| 1  | BS00003733 | 0      |
| 2  | gwm389     | 0      |
| 3  | wmc50      | 0      |
| 4  | barc276a   | 0      |
| 5  | barc1177   | 0.97   |
| 6  | gpw7080    | 4.09   |
| 7  | barc1111   | 6.06   |
| 8  | gwm674     | 7.63   |
| 9  | barc67     | 11.87  |
| 10 | wPt-0476   | 12.62  |
| 11 | gpw4228    | 15.04  |
| 12 | wPt-5281   | 18.67  |
| 13 | BS00000628 | 21.57  |
| 14 | wmc11      | 22.53  |
| 15 | wmc428     | 25.98  |
| 16 | wmc322     | 27.92  |
| 17 | wPt-5133   | 28.6   |
| 18 | cfa2076    | 29.75  |
| 19 | wPt-2748   | 31.92  |
| 20 | wPt-8855   | 31.92  |
| 21 | wPt-7341   | 31.92  |
| 22 | wPt-7217   | 34.7   |
| 23 | barc310    | 34.7   |
| 24 | wPt-3041   | 36.8   |
| 25 | barc294    | 37.83  |
| 26 | barc321    | 38.15  |
| 27 | wPt-8649   | 38.25  |
| 28 | wPt-9369   | 40.51  |
| 29 | wPt-7992   | 40.51  |
| 30 | wPt-6854   | 40.51  |
| 31 | wmc11b     | 42.93  |
| 32 | gwm5       | 67.53  |
| 33 | wPt-1665   | 67.53  |
| 34 | cf193      | 70.53  |
| 35 | SyOpL1556  | 77.73  |
| 36 | wmc264     | 83.53  |
| 37 | wPt-9154   | 83.53  |
| 38 | SyOpL1089  | 84.93  |
| 39 | BS00050109 | 95.02  |
| 40 | BS00049978 | 101.64 |
| 41 | wPt-9049   | 102.15 |
| 42 | wmc153     | 109.53 |
| 43 | SyOpL2293  | 109.53 |
| 44 | SyOpL31    | 116.63 |
| 45 | BS00024548 | 117.16 |
| 46 | wPt-4725   | 128.7  |
| 47 | SyOpL424   | 129.73 |
| 48 | gwm480     | 138.53 |
| 49 | wPt-4065   | 148.7  |
| 50 | wPt-732616 | 149    |
| 51 | BS00022092 | 169.52 |
| 52 | BS00074926 | 173.58 |
| 53 | BS00072145 | 174.13 |
| 54 | wPt-3612   | 174.47 |

## Chromosome 3B

|     |                   |        |
|-----|-------------------|--------|
| 1   | BS00032912        | 0      |
| 2   | Sr2               | 7.68   |
| 3   | SNPPMOp3560048/58 | 10.05  |
| 4   | SNPPMOp964081/7   | 10.05  |
| 5   | gwm389            | 12.11  |
| 6   | wPt-8446          | 12.51  |
| 7   | SNPPMOp1089320/3  | 14.78  |
| 8   | SNPPMOp1348570/58 | 14.78  |
| 9   | wPt-8093          | 15.32  |
| 10  | wPt-742337        | 15.32  |
| 11  | wPt-6043          | 15.41  |
| 12  | BS00009440        | 16.03  |
| 13  | BS00062676        | 16.03  |
| 14  | BS00064778        | 16.03  |
| 15  | wPt-3921          | 16.87  |
| 16  | wPt-3761          | 16.87  |
| 17  | wPt-3609          | 16.91  |
| 18  | gwm533.1          | 17.11  |
| 19  | BS00009476        | 17.22  |
| 20  | BS00012531        | 17.22  |
| 21  | SNPPMOp10286/28   | 17.88  |
| 22  | BS00011532        | 18.38  |
| 23  | SyOpL2053         | 18.88  |
| 24  | BS00011373        | 18.96  |
| 25  | BS00011806        | 18.96  |
| 26  | wPt-666139        | 20.12  |
| 27  | SyOpL1542         | 22.58  |
| 28  | wPt-1081          | 23.11  |
| 29  | BS00022190        | 23.11  |
| 30  | gwm493            | 23.11  |
| 31  | wPt-742648        | 23.11  |
| 32  | SyOpL1730         | 24.68  |
| 33  | wPt-2757          | 25.23  |
| 34  | cf19              | 26.11  |
| 35  | wPt-800213        | 26.52  |
| 36  | wPt-7212          | 28.67  |
| 37  | BS00011966        | 29.08  |
| 38  | SyOpL273          | 30.68  |
| 39  | SyOpL2396         | 33.48  |
| 40  | wmc307            | 34.77  |
| 41  | wmc231            | 34.77  |
| 42  | SyOpL305          | 36.98  |
| 43  | SyOpL1361         | 39.18  |
| 44  | wPt-8238          | 44.04  |
| 45  | BS00070826        | 44.04  |
| 46  | BS00022048        | 44.04  |
| 47  | cf19              | 46.11  |
| 48  | SyOpL2303         | 46.98  |
| 49  | BS00009513        | 47.43  |
| 50  | wPt-6802          | 47.5   |
| 51  | BS00010060        | 50.18  |
| 52  | SyOpL2675         | 50.38  |
| 53  | SyOpL1057         | 50.98  |
| 54  | wPt-371           | 52.55  |
| 55  | gwm285            | 54.06  |
| 56  | BS00010405        | 55.3   |
| 57  | wmc43             | 60.11  |
| 58  | SNPPMOp6664/59    | 60.11  |
| 59  | BS00023074        | 60.47  |
| 60  | BS00003864        | 60.47  |
| 61  | wPt-7486          | 60.59  |
| 62  | wPt-9510          | 60.59  |
| 63  | wmc78             | 60.59  |
| 64  | barc1090          | 60.59  |
| 65  | barc290           | 60.59  |
| 66  | wPt-6239          | 60.59  |
| 67  | wPt-6973          | 61.63  |
| 68  | wPt-1159          | 61.63  |
| 69  | wPt-4209          | 61.97  |
| 70  | SNPPMOp1295258/65 | 62.41  |
| 71  | SNPPMOp1750525/83 | 62.41  |
| 72  | SNPPMOp400706/77  | 62.41  |
| 73  | PAPMOp96539       | 62.41  |
| 74  | gwm566            | 62.64  |
| 75  | wPt-5105          | 63.96  |
| 76  | BS00060014        | 63.96  |
| 77  | wPt-7015          | 63.96  |
| 78  | wPt-9170          | 63.96  |
| 79  | wPt-6945          | 63.96  |
| 80  | gpw7452           | 65.36  |
| 81  | SyOpL1845         | 65.71  |
| 82  | wPt-9432          | 65.81  |
| 83  | SyOpL1930         | 66.01  |
| 84  | barc1111          | 67.68  |
| 85  | wmc777            | 68.07  |
| 86  | BS00110445        | 68.2   |
| 87  | SyOpL759          | 69.31  |
| 88  | BS00015099        | 69.35  |
| 89  | wmc625            | 69.39  |
| 90  | barc1113          | 70.44  |
| 91  | barc1044          | 70.44  |
| 92  | wPt-6047          | 70.63  |
| 93  | Sr12              | 70.63  |
| 94  | wPt-5580          | 70.63  |
| 95  | wPt-5946          | 70.63  |
| 96  | SyOpL858          | 71.11  |
| 97  | barc73            | 71.11  |
| 98  | wPt-5390          | 71.11  |
| 99  | gpw1120           | 71.11  |
| 100 | wPt-0751          | 71.28  |
| 101 | BS00094271        | 71.7   |
| 102 | BS00010136        | 72.32  |
| 103 | wPt-9433          | 73.23  |
| 104 | wPt-5716          | 73.31  |
| 105 | BS00078214        | 73.57  |
| 106 | BS00009701        | 74.17  |
| 107 | wPt-7229          | 74.3   |
| 108 | BS00023030        | 74.72  |
| 109 | wPt-2220          | 74.73  |
| 110 | BS00000978        | 75.29  |
| 111 | wPt-0544          | 75.47  |
| 112 | wPt-0446          | 75.47  |
| 113 | SNPPMOp1095216/14 | 76.71  |
| 114 | PAPMM6398764      | 76.71  |
| 115 | wPt-3327          | 76.71  |
| 116 | wPt-1940          | 76.71  |
| 117 | wmc418            | 80.11  |
| 118 | SyOpL2017         | 80.11  |
| 119 | wmc471            | 80.11  |
| 120 | wPt-7502          | 80.11  |
| 121 | wPt-10003         | 80.11  |
| 122 | wPt-4082          | 80.11  |
| 123 | BS00059417        | 81.61  |
| 124 | BS00022403        | 83.8   |
| 125 | BS00022245        | 84.75  |
| 126 | SyOpL1217         | 85.11  |
| 127 | BS00105878        | 88.15  |
| 128 | barc334           | 91.23  |
| 129 | wPt-1171          | 92.23  |
| 130 | SyOpL2617         | 92.51  |
| 131 | BS00097374        | 92.98  |
| 132 | wPt-9912          | 93.42  |
| 133 | wPt-8056          | 93.53  |
| 134 | wPt-5769          | 93.78  |
| 135 | wmc291            | 97.2   |
| 136 | gwm108            | 97.53  |
| 137 | wPt-5906          | 108.55 |
| 138 | wPt-8096          | 108.55 |
| 139 | wPt-3107          | 110.2  |
| 140 | wPt-1804          | 112.53 |
| 141 | SyOpL2491         | 115.21 |
| 142 | SNPPMOp1526933/1  | 115.45 |
| 143 | BS00070210        | 116.71 |
| 144 | wPt-2439          | 120.82 |
| 145 | barc77            | 121.35 |
| 146 | SyOpL2194         | 121.35 |
| 147 | gpw7258           | 126.29 |
| 148 | SyOpL645          | 132.95 |
| 149 | BS00021967        | 141.58 |
| 150 | wPt-4412          | 143.18 |
| 151 | gwm340            | 143.18 |
| 152 | wPt-1311          | 143.53 |
| 153 | wPt-4370          | 143.53 |
| 154 | wPt-0365          | 144.22 |
| 155 | gpw7220           | 144.22 |
| 156 | wPt-0995          | 144.56 |
| 157 | wPt-8352          | 144.56 |
| 158 | gwm547            | 182.16 |

## Chromosome 3D

|    |                   |        |
|----|-------------------|--------|
| 1  | BS00021930        | 0      |
| 2  | wmc11             | 0      |
| 3  | SNPPMOp561314/18  | 0      |
| 4  | wPt-3921          | 0      |
| 5  | BS00000447        | 5.95   |
| 6  | gdm38             | 13.29  |
| 7  | wmc11a            | 13.29  |
| 8  | gdm99b            | 13.29  |
| 9  | barc284           | 14.94  |
| 10 | wPt-6909          | 14.94  |
| 11 | wPt-5313          | 14.94  |
| 12 | BS00010258        | 15.62  |
| 13 | wmc43             | 16     |
| 14 | wPt-9401          | 16.31  |
| 15 | wPt-1741          | 16.31  |
| 16 | gdm136a           | 16.44  |
| 17 | wPt-3815          | 16.66  |
| 18 | wPt-1336          | 16.66  |
| 19 | wPt-6358          | 16.99  |
| 20 | wPt-4476          | 18.98  |
| 21 | wPt-2013          | 18.98  |
| 22 | wPt-8463          | 19.34  |
| 23 | w117472           | 28.74  |
| 24 | gwm341            | 34.4   |
| 25 | cf19              | 38.84  |
| 26 | BS00098058        | 38.91  |
| 27 | wmc522            | 41.03  |
| 28 | barc323           | 47.47  |
| 29 | barc1161          | 51.87  |
| 30 | gwm314            | 55.5   |
| 31 | cf19              | 57.83  |
| 32 | BS00037276        | 59.19  |
| 33 | wPt-6262          | 60.66  |
| 34 | cf19              | 62.13  |
| 35 | wmc656            | 65     |
| 36 | gwm383            | 65     |
| 37 | cf19              | 65     |
| 38 | BS00021919        | 68.71  |
| 39 | gdm99a            | 70.8   |
| 40 | BS00098495        | 71.14  |
| 41 | wPt-1440          | 76.2   |
| 42 | wmc552            | 83.5   |
| 43 | SNPPMOp1108885/33 | 83.5   |
| 44 | gdm99c            | 85.98  |
| 45 | BS00097485        | 86.43  |
| 46 | wPt-10668         | 104.8  |
| 47 | barc71            | 116.5  |
| 48 | wPt-9525          | 139.45 |

|    |                   |        |
|----|-------------------|--------|
| 1  | BS00108852        | 0      |
| 2  | barc339           | 0      |
| 3  | wmc707            | 0      |
| 4  | barc1158          | 0.65   |
| 5  | barc206           | 14.05  |
| 6  | wPt-7524          | 16.46  |
| 7  | gpw5133           | 17.61  |
| 8  | gpw2271           | 18.3   |
| 9  | gpw7196           | 18.3   |
| 10 | gpw4315.2         | 20.29  |
| 11 | wmc48             | 21.97  |
| 12 | wmc420            | 21.97  |
| 13 | wmc89a            | 22.34  |
| 14 | BS00011378        | 22.61  |
| 15 | barc1052          | 25.77  |
| 16 | barc282           | 25.77  |
| 17 | barc106           | 25.77  |
| 18 | wPt-2788          | 28.55  |
| 19 | SNPPMOp1043912/75 | 28.55  |
| 20 | wPt-9057          | 28.95  |
| 21 | wPt-5694          | 29.15  |
| 22 | wPt-0117          | 29.15  |
| 23 | wPt-7939          | 29.84  |
| 24 | wPt-0817          | 30.16  |
| 25 | wPt-7924          | 30.48  |
| 26 | BS00022213        | 31.81  |
| 27 | wmc650            | 35.05  |
| 28 | wmc262            | 41.21  |
| 29 | wPt-7001          | 41.3   |
| 30 | wmc232            | 46.38  |
| 31 | wPt-8078          | 48.09  |
| 32 | wmc161_1          | 53.75  |
| 33 | wmc161            | 56.05  |
| 34 | BS00011939        | 56.05  |
| 35 | BS00022837        | 56.05  |
| 36 | BS00018651        | 56.05  |
| 37 | BS00023220        | 56.05  |
| 38 | wPt-1091          | 58.56  |
| 39 | SNPPMOp10698/14   | 60.65  |
| 40 | PAPMM6100799      | 60.65  |
| 41 | BS00021957        | 64.58  |
| 42 | wPt-6997          | 67.01  |
| 43 | wPt-5857          | 67.01  |
| 44 | wPt-9196          | 68.4   |
| 45 | wPt-1743          | 68.73  |
| 46 | wPt-5124          | 69.01  |
| 47 | wmc283            | 69.05  |
| 48 | SyOpL2079         | 69.91  |
| 49 | barc78            | 70.68  |
| 50 | wmc313            | 70.68  |
| 51 | barc327           | 72.65  |
| 52 | gwm350            | 73.29  |
| 53 | BS00039766        | 73.39  |
| 54 | BS00106888        | 73.39  |
| 55 | gpw3094           | 73.94  |
| 56 | gpw4334.1         | 74.29  |
| 57 | wPt-5749          | 76.08  |
| 58 | wPt-3349          | 83.68  |
| 59 | SyOpL2131         | 83.98  |
| 60 | wPt-3795          | 86.76  |
| 61 | wPt-7807          | 86.76  |
| 62 | wPt-2084          | 86.76  |
| 63 | SNPPMOp37313/61   | 86.76  |
| 64 | wPt-1362          | 86.76  |
| 65 | wPt-7821          | 86.76  |
| 66 | wPt-2319          | 86.76  |
| 67 | wPt-9884          | 86.76  |
| 68 | wPt-5212          | 86.76  |
| 69 | wPt-1961          | 87.74  |
| 70 | wPt-5172          | 87.74  |
| 71 | wPt-0610          | 87.74  |
| 72 | wPt-2951          | 87.74  |
| 73 | wPt-4680          | 87.74  |
| 74 | wPt-0150          | 87.74  |
| 75 | wPt-3491          | 87.74  |
| 76 | gwm160            | 89.05  |
| 77 | SyOpL311          | 89.05  |
| 78 | SNPPMOp1112908/84 | 89.05  |
| 79 | SNPPMOp241208/61  | 89.05  |
| 80 | SyOpL544          | 89.05  |
| 81 | wPt-5434          | 101.28 |
| 82 | wPt-4487          | 103.2  |
| 83 | wPt-6390          | 103.2  |
| 84 | wmc219            | 103.2  |
| 85 | wPt-3402          | 113.43 |

|    |                   |        |
|----|-------------------|--------|
| 1  | BS00022846        | 0      |
| 2  | wPt-5559          | 0      |
| 3  | wPt-8756          | 0      |
| 4  | gwm495            | 0      |
| 5  | SyOpL2051         | 0.54   |
| 6  | wPt-9192          | 0.65   |
| 7  | wPt-1046          | 3.3    |
| 8  | wPt-8650          | 5.99   |
| 9  | SyOpL1859         | 9.44   |
| 10 | BS00106142        | 13.07  |
| 11 | barc1142          | 13.57  |
| 12 | SyOpL1441         | 22.24  |
| 13 | barc1133          | 22.26  |
| 14 | barc1179          | 23.66  |
| 15 | barc1045          | 25.66  |
| 16 | BS00101115        | 30.67  |
| 17 | wPt-3015          | 30.97  |
| 18 | BS00010830        | 36.14  |
| 19 | cfD22             | 40.04  |
| 20 | wPt-6149          | 42.62  |
| 21 | BS00076259        | 44.52  |
| 22 | wmc710            | 49.11  |
| 23 | SyOpL189          | 49.11  |
| 24 | wPt-1708          | 49.11  |
| 25 | wPt-3991          | 50.78  |
| 26 | wPt-5334          | 51.44  |
| 27 | SNPPMM6863970/69  | 52.04  |
| 28 | wmc511            | 52.04  |
| 29 | tPt-0602          | 52.04  |
| 30 | gwm6              | 52.04  |
| 31 | gwm113            | 52.04  |
| 32 | tPt-602           | 52.04  |
| 33 | gwm513            | 57.67  |
| 34 | BS00009774        | 58.97  |
| 35 | SNPPMOp1023737/43 | 63.74  |
| 36 | wmc125            | 63.74  |
| 37 | wPt-5303          | 63.74  |
| 38 | SyOpL1920         | 67.14  |
| 39 | BS00014075        | 79.6   |
| 40 | BS00073758        | 88.67  |
| 41 | BS00083036        | 94.55  |
| 42 | BS00022793        | 102.52 |
| 43 | wPt-1115          | 102.93 |
| 44 | BS00010015        | 108.25 |

|    |                   |       |
|----|-------------------|-------|
| 1  | wmc285            | 0     |
| 2  | wPt-5184          | 0     |
| 3  | rht-4D            | 0     |
| 4  | SNPPMOp157615/40  | 1.1   |
| 5  | wPt-0648          | 3.2   |
| 6  | wPt-4572          | 3.5   |
| 7  | wPt-648           | 3.5   |
| 8  | wPt-0941          | 16.85 |
| 9  | gpw4315.1         | 17.88 |
| 10 | wmc89b            | 19.24 |
| 11 | wmc720            | 19.56 |
| 12 | wPt-3178          | 22.95 |
| 13 | wPt-2379          | 22.95 |
| 14 | barc98            | 23.29 |
| 15 | cfD71             | 23.29 |
| 16 | gpw4087           | 23.63 |
| 17 | gpw7414           | 23.95 |
| 18 | gwm608            | 33.9  |
| 19 | gpw342            | 34.17 |
| 20 | wmc473            | 35.9  |
| 21 | wmc331            | 35.94 |
| 22 | wPt-5809          | 38.74 |
| 23 | wPt-3058          | 38.74 |
| 24 | BS00022113        | 39.41 |
| 25 | gwm165            | 40.9  |
| 26 | BS00023943        | 42.08 |
| 27 | SNPPMOp1138764/28 | 45.2  |
| 28 | wPt-7878          | 47.35 |
| 29 | SNPPMOp1293165/14 | 51.7  |
| 30 | gpw311            | 54.66 |
| 31 | BS00023934        | 69.71 |
| 32 | cfD84             | 69.9  |
| 33 | SNPPMOp1286622/25 | 74.3  |
| 34 | BS00089403        | 79.51 |
| 35 | wPt-1412          | 81.29 |
| 36 | gwm194            | 83.43 |

|    |                   |        |
|----|-------------------|--------|
| 1  | gwm156A           | 0      |
| 2  | gwm186            | 0      |
| 3  | cfD39             | 0      |
| 4  | barc141           | 1.29   |
| 5  | BS00022110        | 2.65   |
| 6  | BS00022500        | 3.28   |
| 7  | BS00011278        | 3.86   |
| 8  | wPt-10161         | 4.39   |
| 9  | wmc713            | 4.39   |
| 10 | wPt-9748          | 4.39   |
| 11 | BS00089357        | 6.94   |
| 12 | BS00011116        | 7.51   |
| 13 | BS00087453        | 8.65   |
| 14 | BS00051181        | 9.19   |
| 15 | BS00011537        | 9.73   |
| 16 | gwm293b           | 10.31  |
| 17 | gpw2136           | 10.79  |
| 18 | cos5F             | 11.59  |
| 19 | gwm639            | 13.25  |
| 20 | wPt-3563          | 15.13  |
| 21 | gpw2172           | 15.96  |
| 22 | wPt-3334          | 19.95  |
| 23 | wPt-1903          | 19.95  |
| 24 | wPt-5231          | 20.97  |
| 25 | wmc327            | 27.9   |
| 26 | wmc524            | 29.24  |
| 27 | SyOpL2731         | 33.77  |
| 28 | gwm291            | 38.81  |
| 29 | gpw7007           | 39.4   |
| 30 | gwm304            | 40.39  |
| 31 | wmc705            | 40.39  |
| 32 | wmc805            | 40.39  |
| 33 | wPt-9887          | 40.39  |
| 34 | SNPPMOp1978/35    | 40.47  |
| 35 | PAPMOp105221      | 40.47  |
| 36 | B1-5A             | 41.26  |
| 37 | SNPPMOp717499/31  | 41.27  |
| 38 | barc117           | 41.27  |
| 39 | PAPMOp576041      | 41.87  |
| 40 | wPt-4131          | 41.97  |
| 41 | BS00021708        | 41.97  |
| 42 | SNPPMOp314722/69  | 41.97  |
| 43 | wPt-4249          | 41.97  |
| 44 | PAPMOp1059158     | 41.97  |
| 45 | wPt-2768          | 41.97  |
| 46 | wPt-6048          | 41.97  |
| 47 | SyOpL643          | 42.27  |
| 48 | wPt-6990          | 44.04  |
| 49 | gwm304            | 45.27  |
| 50 | gpw2273           | 50.37  |
| 51 | wPt-8794          | 55.01  |
| 52 | SNPPMOp1096021/17 | 61.79  |
| 53 | gwm617            | 62.27  |
| 54 | wmc415            | 65.27  |
| 55 | BS00029413        | 76.07  |
| 56 | SNPPMOp115775/59  | 110.29 |
| 57 | wPt-5096          | 126.59 |
| 58 | wmc727            | 126.59 |
| 59 | SyOpL778          | 126.59 |
| 60 | wPt-733461        | 126.63 |
| 61 | wPt-5142          | 144.88 |
| 62 | BS00082218        | 145.37 |
| 63 | BS00091080        | 172.16 |
| 64 | BS00010234        | 196.52 |

|    |                   |        |
|----|-------------------|--------|
| 1  | BS00009264        | 0      |
| 2  | wPt-1302          | 19.81  |
| 3  | SyOpL283          | 20.51  |
| 4  | SyOpL250          | 20.51  |
| 5  | gwm234            | 22.54  |
| 6  | BS00102828        | 22.54  |
| 7  | BS00015136        | 22.54  |
| 8  | wPt-8406          | 27.44  |
| 9  | wPt-3873          | 29.16  |
| 10 | wPt-1149          | 30.26  |
| 11 | wPt-5346          | 33.78  |
| 12 | wPt-1589          | 36.74  |
| 13 | SNPPMOp185131/43  | 37.41  |
| 14 | BS00062617        | 37.67  |
| 15 | wPt-2586          | 39.55  |
| 16 | BS00018917        | 40.72  |
| 17 | SNPPMOp201244/17  | 42.91  |
| 18 | wPt-4996          | 42.91  |
| 19 | barc4             | 42.91  |
| 20 | SNPPMOp130896/16  | 44.71  |
| 21 | gwm544            | 45.54  |
| 22 | BS00107222        | 48.42  |
| 23 | BS00035899        | 54.21  |
| 24 | gwm213            | 54.88  |
| 25 | gwm371            | 57.54  |
| 26 | SNPPMOp445009/5   | 59.61  |
| 27 | barc74            | 63.95  |
| 28 | BS00003876        | 64.53  |
| 29 | wmc415            | 68.54  |
| 30 | PAPMM6100537      | 70.73  |
| 31 | wPt-2607          | 72.75  |
| 32 | BS00091302        | 76.36  |
| 33 | BS00011386        | 76.36  |
| 34 | wPt-1250          | 76.36  |
| 35 | wPt-3457          | 77.93  |
| 36 | SNPPMOp1472/52    | 77.93  |
| 37 | wPt-9356          | 79.62  |
| 38 | BS00010952        | 82.65  |
| 39 | SyOpL2437         | 84.24  |
| 40 | wPt-3661          | 85.43  |
| 41 | SNPPMOp332417/44  | 90.64  |
| 42 | BS00009414        | 95.11  |
| 43 | SNPPMOp468860/33  | 95.34  |
| 44 | wPt-1733          | 96.44  |
| 45 | wmc289            | 96.54  |
| 46 | SyOpL1005         | 96.54  |
| 47 | wPt-5896          | 96.54  |
| 48 | wPt-6014          | 99.79  |
| 49 | wPt-3030          | 103.11 |
| 50 | BS00000592        | 104.22 |
| 51 | wPt-0750          | 104.57 |
| 52 | gdm136b           | 109.74 |
| 53 | barc275           | 110.1  |
| 54 | gwm408            | 111.68 |
| 55 | BS00022963        | 112.25 |
| 56 | gwm604            | 117.07 |
| 57 | SNPPMOp1640210/20 | 118.14 |
| 58 | SyOpL1960         | 118.14 |
| 59 | SNPPMOp558187/29  | 118.14 |
| 60 | barc142           | 118.54 |
| 61 | rPt-3114          | 119.44 |
| 62 | wPt-9598          | 119.64 |
| 63 | wPt-1482          | 119.64 |
| 64 | wPt-9103          | 119.64 |
| 65 | wPt-0935          | 119.98 |
| 66 | wPt-9205          | 119.98 |
| 67 | wPt-8094          | 119.98 |
| 68 | wmc99             | 123.95 |
| 69 | wmc235            | 127.36 |
| 70 | barc232           | 128.09 |
| 71 | barc266           | 129.8  |
| 72 | gwm142            | 135.52 |
| 73 | barc59            | 138.54 |
| 74 | BS00003655        | 140.64 |
| 75 | BS00021960        | 144.27 |
| 76 | wPt-4418          | 149.6  |
| 77 | BS00021709        | 150.58 |
| 78 | wPt-0927          | 153.56 |
| 79 | barc243           | 155.57 |
| 80 | barc156           | 158.68 |
| 81 | wPt-9815          | 168.66 |
| 82 | gwm118            | 174.39 |
| 83 | wPt-3922          | 175.79 |
| 84 | wPt-9116          | 176.13 |
| 85 | wPt-7665          | 176.13 |
| 86 | wPt-2373          | 176.13 |
| 87 | barc1120          | 176.56 |
| 88 | wPt-0484          | 177.42 |
| 89 | wPt-0837          | 193.09 |
| 90 | wPt-9894          | 193.09 |
| 91 | wPt-4898          | 193.09 |
| 92 | wPt-9027          | 193.09 |

|    |            |        |
|----|------------|--------|
| 1  | wPt-5032   | 0      |
| 2  | cfD18      | 0      |
| 3  | Pina       | 8.02   |
| 4  | Pinb       | 9.36   |
| 5  | wPt-6225   | 24.2   |
| 6  | gwm358     | 29.01  |
| 7  | BS00022100 | 29.01  |
| 8  | BS00021901 | 29.59  |
| 9  | gwm159     | 29.59  |
| 10 | BS00041838 | 30.21  |
| 11 | BS00022067 | 33.64  |
| 12 | gwm174     | 56.2   |
| 13 | gwm182     | 60.2   |
| 14 | SrHD       | 85.3   |
| 15 | gwm212     | 106.53 |
| 16 | BS00022228 | 121.33 |

## Chromosome 6A

|    |                   |        |
|----|-------------------|--------|
| 1  | gwm617_2          | 0      |
| 2  | SNPPMOp1519638/55 | 0      |
| 3  | wmc417_1          | 8.6    |
| 4  | wmc570            | 26.2   |
| 5  | BS00011125        | 45.04  |
| 6  | PAPMM6137386      | 51.2   |
| 7  | wPt-1664          | 51.88  |
| 8  | wPt-9382          | 51.88  |
| 9  | wPt-0832          | 54.35  |
| 10 | wPt-7475          | 54.68  |
| 11 | wPt-1377          | 54.68  |
| 12 | BS00083630        | 55.92  |
| 13 | wPt-669498        | 60.35  |
| 14 | gwm334            | 65     |
| 15 | BS00010933        | 65     |
| 16 | wPt-7623          | 65     |
| 17 | wPt-6520          | 65     |
| 18 | SNPPMOp10333/21   | 65     |
| 19 | wPt-4016          | 65     |
| 20 | wPt-8266          | 78.21  |
| 21 | wPt-2573          | 85.96  |
| 22 | wPt-7127          | 85.96  |
| 23 | wPt-9690          | 85.96  |
| 24 | gpw3087           | 87.69  |
| 25 | wPt-0959          | 88.72  |
| 26 | wPt-7599          | 89.08  |
| 27 | wPt-0357          | 89.43  |
| 28 | wPt-8833          | 89.43  |
| 29 | wPt-3091          | 89.43  |
| 30 | wmc807            | 104    |
| 31 | wPt-7373          | 108.93 |
| 32 | barc144           | 112.91 |
| 33 | BS00082104        | 119.3  |
| 34 | gwm570            | 119.3  |
| 35 | wPt-5601          | 125.33 |
| 36 | wPt-8662          | 133.08 |
| 37 | wPt-5310          | 134.82 |
| 38 | BS00021965        | 140.9  |
| 39 | wmc417            | 149    |
| 40 | gwm617            | 158    |
| 41 | gwm427            | 162.76 |
| 42 | wPt-6696          | 164.93 |
| 43 | BS00003339        | 167    |
| 44 | wPt-4229          | 167.28 |
| 45 | wPt-9474          | 167.28 |
| 46 | wPt-1661          | 167.63 |
| 47 | wPt-1642          | 167.63 |
| 48 | wPt-9976          | 167.63 |
| 49 | wPt-4445          | 167.63 |
| 50 | gpw7433.2         | 169.03 |
| 51 | wPt-7204          | 169.37 |
| 52 | wPt-1695          | 169.37 |
| 53 | wPt-8124          | 169.37 |
| 54 | wPt-6268          | 173.84 |
| 55 | wmc254            | 211    |
| 56 | wmc59             | 219    |

## Chromosome 6B

|    |            |        |
|----|------------|--------|
| 1  | wPt-2175   | 0      |
| 2  | wPt-7745   | 0      |
| 3  | wPt-8721   | 0      |
| 4  | barc1136   | 0      |
| 5  | wmc397     | 0      |
| 6  | gpw1079    | 0      |
| 7  | wPt-3774   | 0.98   |
| 8  | wPt-7662   | 0.98   |
| 9  | BS00003785 | 1.39   |
| 10 | BS00003792 | 1.39   |
| 11 | BS00009795 | 1.39   |
| 12 | gwm88      | 1.47   |
| 13 | wPt-3376   | 1.87   |
| 14 | wPt-4930   | 1.87   |
| 15 | barc1159   | 2.17   |
| 16 | barc1093   | 2.5    |
| 17 | gwm58      | 2.83   |
| 18 | gpw5076    | 4.15   |
| 19 | barc354    | 4.15   |
| 20 | wPt-9532   | 5.2    |
| 21 | wPt-7777   | 6.18   |
| 22 | wPt-3581   | 6.18   |
| 23 | wPt-6994   | 6.6    |
| 24 | wPt-4720   | 6.6    |
| 25 | wPt-4283   | 6.6    |
| 26 | wPt-7150   | 6.6    |
| 27 | wPt-5234   | 6.6    |
| 28 | wPt-2689   | 6.6    |
| 29 | wPt-0245   | 6.6    |
| 30 | wPt-1852   | 6.61   |
| 31 | wPt-3304   | 6.61   |
| 32 | wPt-7207   | 6.94   |
| 33 | wPt-8239   | 6.95   |
| 34 | wPt-4924   | 7.18   |
| 35 | wPt-1922   | 7.27   |
| 36 | wPt-3130   | 7.27   |
| 37 | wPt-9990   | 7.27   |
| 38 | wPt-4386   | 7.27   |
| 39 | wPt-8015   | 7.27   |
| 40 | wPt-3060   | 8.88   |
| 41 | wPt-4648   | 9.21   |
| 42 | BS00010443 | 11.14  |
| 43 | gwm174     | 13.41  |
| 44 | wPt-5596   | 29.9   |
| 45 | BS00010415 | 32.29  |
| 46 | cfid13     | 32.29  |
| 47 | wPt-5333   | 32.29  |
| 48 | BS00003852 | 33.01  |
| 49 | BS00022668 | 44.48  |
| 50 | wPt-3733   | 44.48  |
| 51 | gwm518     | 44.48  |
| 52 | barc1169   | 44.48  |
| 53 | wPt-2964   | 44.48  |
| 54 | wPt-7636   | 44.48  |
| 55 | BS00086964 | 50.86  |
| 56 | barc14a    | 52.76  |
| 57 | wPt-5461   | 53.18  |
| 58 | wPt-4164   | 56.5   |
| 59 | wPt-9952   | 56.5   |
| 60 | wPt-6116   | 56.5   |
| 61 | wPt-3045   | 57.15  |
| 62 | wPt-1264   | 57.15  |
| 63 | wPt-8268   | 57.51  |
| 64 | BS00010993 | 57.68  |
| 65 | wPt-5037   | 57.98  |
| 66 | wmc152     | 58.67  |
| 67 | BS00109036 | 58.87  |
| 68 | BS00023187 | 60.57  |
| 69 | wPt-6023   | 61.08  |
| 70 | wPt-6802   | 64.35  |
| 71 | gwm200a    | 64.97  |
| 72 | wmc417     | 78.58  |
| 73 | BS00022480 | 79.5   |
| 74 | wPt-5480   | 101.85 |
| 75 | BS00011458 | 102.63 |
| 76 | BS00085589 | 102.63 |
| 77 | wPt-0171   | 106.82 |
| 78 | wPt-1541   | 107.11 |
| 79 | BS00010618 | 107.41 |
| 80 | wPt-9256   | 110.09 |
| 81 | BS00023066 | 110.4  |
| 82 | BS00110651 | 126.18 |
| 83 | wPt-732061 | 128.07 |

## Chromosome 6D

|    |                   |        |
|----|-------------------|--------|
| 1  | BS00003785        | 0      |
| 2  | BS00003792        | 0      |
| 3  | BS00009795        | 0      |
| 4  | wPt-6994          | 0      |
| 5  | SNPPMM61159750/20 | 0      |
| 6  | wPt-3774          | 0      |
| 7  | PAPMM6106536      | 0      |
| 8  | wPt-7777          | 0      |
| 9  | wPt-7662          | 0      |
| 10 | wPt-1922          | 0      |
| 11 | wPt-9532          | 0      |
| 12 | wPt-4720          | 0      |
| 13 | wPt-4283          | 0      |
| 14 | wPt-7207          | 0      |
| 15 | wPt-3130          | 0.01   |
| 16 | wPt-1852          | 0.01   |
| 17 | wPt-9990          | 0.01   |
| 18 | wPt-8239          | 0.01   |
| 19 | wPt-3304          | 0.01   |
| 20 | SyOpL281          | 1      |
| 21 | SyOpL2232         | 3.4    |
| 22 | SyOpL362          | 4.6    |
| 23 | BS00010443        | 5.45   |
| 24 | SyOpL1457         | 7.3    |
| 25 | SyOpL1451         | 10     |
| 26 | SyOpL1919         | 10     |
| 27 | wPt-3424          | 11.3   |
| 28 | SNPPMOp1239709/60 | 11.3   |
| 29 | SNPPMOp157697/36  | 17.8   |
| 30 | wPt-2175          | 18.2   |
| 31 | SyOpL1247         | 18.5   |
| 32 | SyOpL14           | 19.8   |
| 33 | wPt-5596          | 22.95  |
| 34 | BS00010415        | 26.6   |
| 35 | cfid13            | 26.6   |
| 36 | SNPPMOp1227776/50 | 26.6   |
| 37 | wPt-5333          | 27.62  |
| 38 | BS00003852        | 30.05  |
| 39 | gwm518            | 40.6   |
| 40 | SNPPMOp103652/20  | 40.6   |
| 41 | SyOpL1051         | 41.2   |
| 42 | BS00022668        | 41.52  |
| 43 | wPt-3733          | 41.52  |
| 44 | BS00086964        | 47.9   |
| 45 | wPt-5461          | 48.31  |
| 46 | SNPPMOp261873/83  | 51.4   |
| 47 | wPt-5037          | 53.11  |
| 48 | BS00010993        | 54.72  |
| 49 | BS00109036        | 55.91  |
| 50 | BS00023187        | 57.61  |
| 51 | wmc152            | 62.6   |
| 52 | SNPPMOp3332865/80 | 62.6   |
| 53 | wmc417-2          | 62.6   |
| 54 | SNPPMOp372691/21  | 62.6   |
| 55 | wPt-6802          | 63.37  |
| 56 | SyOpL1225         | 73.4   |
| 57 | SyOpL740          | 74.4   |
| 58 | SyOpL313          | 75     |
| 59 | BS00022480        | 76.54  |
| 60 | PAPMOp86183       | 77.4   |
| 61 | wmc417            | 77.6   |
| 62 | BS00011458        | 99.67  |
| 63 | BS00085589        | 99.67  |
| 64 | wPt-5480          | 100.87 |
| 65 | BS00010618        | 104.45 |
| 66 | wPt-0171          | 105.84 |
| 67 | wPt-1541          | 106.13 |
| 68 | BS00023066        | 107.44 |
| 69 | wPt-9256          | 109.11 |
| 70 | BS00110651        | 123.22 |
| 71 | wPt-732061        | 127.09 |

## Chromosome 7A

|    |                   |        |
|----|-------------------|--------|
| 1  | wPt-9651          | 0      |
| 2  | wPt-0433          | 0      |
| 3  | cfa2174           | 0      |
| 4  | wmc479            | 7.83   |
| 5  | gwm635a           | 10.55  |
| 6  | BS00022406        | 10.55  |
| 7  | BS00022082        | 10.55  |
| 8  | wmc83             | 11.68  |
| 9  | wPt-672171        | 13.45  |
| 10 | wPt-8043          | 13.55  |
| 11 | gwm332            | 13.6   |
| 12 | wPt-2371          | 13.95  |
| 13 | barc1004          | 14.13  |
| 14 | barc70            | 14.55  |
| 15 | barc22            | 14.79  |
| 16 | wPt-9207          | 15.24  |
| 17 | gpw3127           | 15.36  |
| 18 | wPt-7448          | 17.26  |
| 19 | wPt-1639          | 17.26  |
| 20 | wPt-6668          | 20.06  |
| 21 | SNPPMOp1069993/13 | 20.17  |
| 22 | wPt-4748          | 20.17  |
| 23 | wPt742244         | 20.17  |
| 24 | SNPPMOp410647/16  | 21.77  |
| 25 | SyOpL1199         | 22.47  |
| 26 | wPt-6013          | 23.32  |
| 27 | wPt-5558          | 23.32  |
| 28 | wPt-4553          | 23.69  |
| 29 | wPt-0961          | 23.69  |
| 30 | BS00010988        | 24.29  |
| 31 | BS00013872        | 29.85  |
| 32 | wPt-5257          | 31.31  |
| 33 | barc154           | 31.51  |
| 34 | barc127           | 33.88  |
| 35 | wmc283.1          | 34.61  |
| 36 | wPt-9796          | 35.69  |
| 37 | wPt-3883          | 35.69  |
| 38 | wPt-7186          | 36.28  |
| 39 | BS00002556        | 36.33  |
| 40 | wPt8418           | 39.01  |
| 41 | gwm60             | 41.11  |
| 42 | BS00111112        | 41.83  |
| 43 | wmc283_1          | 44.17  |
| 44 | wmc283            | 44.37  |
| 45 | gwm471            | 46.39  |
| 46 | wPt-744715        | 49.75  |
| 47 | SNPPMOp2675910/36 | 52.37  |
| 48 | cfa2028           | 52.37  |
| 49 | wPt-4515          | 52.37  |
| 50 | SyOpL2262         | 53.87  |
| 51 | BS00021771        | 63.13  |
| 52 | barc121_1         | 75.57  |
| 53 | BS00000847        | 80.37  |
| 54 | barc121           | 80.37  |
| 55 | wmc607            | 81.37  |
| 56 | SyOpL2323         | 94.27  |
| 57 | BS00078174        | 96.89  |
| 58 | SyOpL2300         | 98.57  |
| 59 | SyOpL896          | 109.47 |
| 60 | cfa2019           | 111.37 |
| 61 | wmc633            | 112.37 |
| 62 | cfa2040_3         | 112.57 |
| 63 | SyOpL2086         | 121.67 |
| 64 | cfa2040a          | 123.37 |
| 65 | wPt-8670          | 123.37 |
| 66 | SyOpL1907         | 124.07 |
| 67 | SyOpL1876         | 126.47 |
| 68 | BS00010809        | 141.14 |
| 69 | wPt-741686        | 151.37 |
| 70 | wPt-6495          | 155.27 |
| 71 | BS00022560        | 157.71 |
| 72 | wPt-7763          | 168.97 |
| 73 | BS00073988        | 171.13 |
| 74 | wPt-8846          | 174.15 |
| 75 | BS00011622        | 178.56 |
| 76 | BS00081108        | 192.28 |
| 77 | BS00023200        | 203.33 |

## Chromosome 7B

|    |                  |        |
|----|------------------|--------|
| 1  | wmc323           | 0      |
| 2  | barc279          | 16.09  |
| 3  | wPt-7318         | 29.59  |
| 4  | gwm537           | 40     |
| 5  | gwm573           | 53     |
| 6  | wPt-7653         | 53     |
| 7  | gpw3188          | 53     |
| 8  | gpw4444          | 53     |
| 9  | gpw7342          | 53     |
| 10 | gwm46            | 53     |
| 11 | wPt-4863         | 53     |
| 12 | wPt-0963         | 53     |
| 13 | wPt-4230         | 53     |
| 14 | wmc335           | 53     |
| 15 | gwm297           | 53     |
| 16 | barc289          | 53     |
| 17 | barc276b         | 56.59  |
| 18 | barc276c         | 57.69  |
| 19 | wPt-7934         | 60.51  |
| 20 | wPt-6498         | 60.51  |
| 21 | wPt-1149         | 66.54  |
| 22 | wPt-2572         | 67.65  |
| 23 | wPt-3873         | 69.6   |
| 24 | wPt-6372         | 69.6   |
| 25 | wPt-2305         | 72.19  |
| 26 | wPt0312          | 72.19  |
| 27 | barc1014         | 73.22  |
| 28 | barc278          | 75.96  |
| 29 | wPt-3730         | 77.73  |
| 30 | wPt-4025         | 77.73  |
| 31 | BS00011069       | 79.15  |
| 32 | wPt-2994         | 80.59  |
| 33 | wPt-2273         | 80.59  |
| 34 | BS00010500       | 81.39  |
| 35 | BS00022106       | 82.63  |
| 36 | wPt-7351         | 85.31  |
| 37 | BS00065735       | 86.11  |
| 38 | wPt-1826         | 91.23  |
| 39 | wmc517           | 92     |
| 40 | wPt-3723         | 92     |
| 41 | wPt-9925         | 93.91  |
| 42 | SNPPMM6777963/4  | 94.54  |
| 43 | gpw8040          | 98.7   |
| 44 | wPt-8007         | 99.34  |
| 45 | wPt-0600         | 101.54 |
| 46 | SyOpL143         | 101.54 |
| 47 | wPt-3190         | 101.54 |
| 48 | wPt-4258         | 103    |
| 49 | SyOpL1352        | 105.14 |
| 50 | BS00023023       | 106.8  |
| 51 | SNPPMOp402574/42 | 108.24 |
| 52 | wPt-5343         | 108.54 |
| 53 | BS00010251       | 108.54 |
| 54 | SNPPMOp108828/50 | 108.54 |
| 55 | SyOpL1351        | 108.54 |
| 56 | wPt-0194         | 114.82 |
| 57 | BS00074359       | 115.78 |
| 58 | wPt-2356         | 118.97 |
| 59 | wPt-4300         | 119.31 |
| 60 | BS00009464       | 122.29 |
| 61 | BS00011065       | 123.66 |
| 62 | wPt-5462         | 133.74 |
| 63 | gwm577           | 136    |
| 64 | gwm111           | 141.19 |
| 65 | BS00010142       | 153.26 |
| 66 | wPt-9488         | 154.4  |

## Chromosome 7D

|    |                   |        |
|----|-------------------|--------|
| 1  | cfa2040           | 0      |
| 2  | wPt-2565          | 0      |
| 3  | wPt-665260        | 3.72   |
| 4  | gwm635            | 8.32   |
| 5  | barc121_2         | 11.82  |
| 6  | gwm130            | 17.21  |
| 7  | gwm437            | 17.21  |
| 8  | gpw5199           | 17.21  |
| 9  | wPt-8798          | 21.1   |
| 10 | gpw1142           | 23.39  |
| 11 | barc128b          | 25.86  |
| 12 | gwm473            | 30.31  |
| 13 | SNPPMOp1043882/16 | 31.49  |
| 14 | cfd21_1           | 32.92  |
| 15 | Sr57              | 33.2   |
| 16 | w117337           | 37.29  |
| 17 | BS00022463        | 41.42  |
| 18 | wPt-1100          | 45.14  |
| 19 | wPt-3328          | 45.14  |
| 20 | barc1104          | 45.21  |
| 21 | barc352           | 46.8   |
| 22 | wPt-7171          | 47.42  |
| 23 | SNPPMOp101458/70  | 47.42  |
| 24 | wPt-789           | 47.42  |
| 25 | csLV34            | 48.02  |
| 26 | SNPPMOp1034549/16 | 48.02  |
| 27 | cssfr5            | 49.32  |
| 28 | wmc463            | 49.32  |
| 29 | gwm428            | 56.48  |
| 30 | cfd21             | 57.32  |
| 31 | wPt-9822          | 61.29  |
| 32 | wPt-2258          | 61.29  |
| 33 | SNPPMM62481791/38 | 61.29  |
| 34 | SyOpL1368         | 61.29  |
| 35 | wPt-7763          | 61.29  |
| 36 | wPt-731810        | 61.29  |
| 37 | wPt-7642          | 61.29  |
| 38 | cfd66             | 63.19  |
| 39 | gdm145            | 64.97  |
| 40 | wmc157            | 69.07  |
| 41 | BS00021987        | 69.16  |
| 42 | BS00022511        | 69.16  |
| 43 | BS00022721        | 69.16  |
| 44 | BS00022875        | 69.16  |
| 45 | BS00023045        | 69.16  |
| 46 | BS00003945        | 69.74  |
| 47 | BS00010071        | 69.74  |
| 48 | BS00012122        | 69.74  |
| 49 | BS00021745        | 69.74  |
| 50 | BS00023184        | 69.74  |
| 51 | BS00024032        | 69.74  |
| 52 | BS00024103        | 69.74  |
| 53 | BS00009623        | 70.3   |
| 54 | BS00011639        | 70.3   |
| 55 | BS00079734        | 70.3   |
| 56 | wPt-2054          | 70.32  |
| 57 | barc97            | 72.01  |
| 58 | cfd41             | 78.54  |
| 59 | barc121           | 84.32  |
| 60 | wPt-1859          | 84.32  |
| 61 | gpw5192           | 84.32  |
| 62 | wPt-6716          | 84.32  |
| 63 | gpw7683           | 103.13 |
| 64 | wPt-3923          | 115.56 |
| 65 | wPt-5674          | 115.56 |
| 66 | wPt-664017        | 116.52 |
| 67 | gwm635_1          | 117.9  |
| 68 | gwm37             | 120.32 |
| 69 | cfa2040b          | 122.32 |
